# Supplementary material for: BnMs3 is required for tapetal differentiation and degradation, microspore separation, and pollen-wall biosynthesis in Brassica napus
Source: PubMed Central journal article supplement — J Exp Bot. 2011 Dec 15;63(5):2041–58. doi: 10.1093/jxb/err405 (PMC3295392; doi:10.1093/jxb/err405), 2011-12-15
Supplement: supp_err405_00069120-file001.pdf [file supp_err405_00069120-file001.pdf]

***BnMs3* is required for tapetal differentiation and degradation,  
microspore separation, and pollen wall biosynthesis in *Brassica  
napus***

*Zhengfu Zhou, Xiaoling Dun, Shengqian Xia, Dianyi Shi, Maomao Qin,  
Jing Wen, Bin Yi, Jinxiong Shen, Chaozhi Ma, Jinxing Tu, and Tingdong  
Fu*

**Supplementary Material**

## Supplemental Figure S1.

Differential screening of the subtracted libraries using macroarray analysis.

The PCR products of cDNA clones were blotted onto two nylon membranes at the same locations, and the membranes were then hybridized with cDNA probes from anthers of 7365A (A) and 7365B (B). Circles indicate representatives of the down-regulated clones in 7365A anthers.

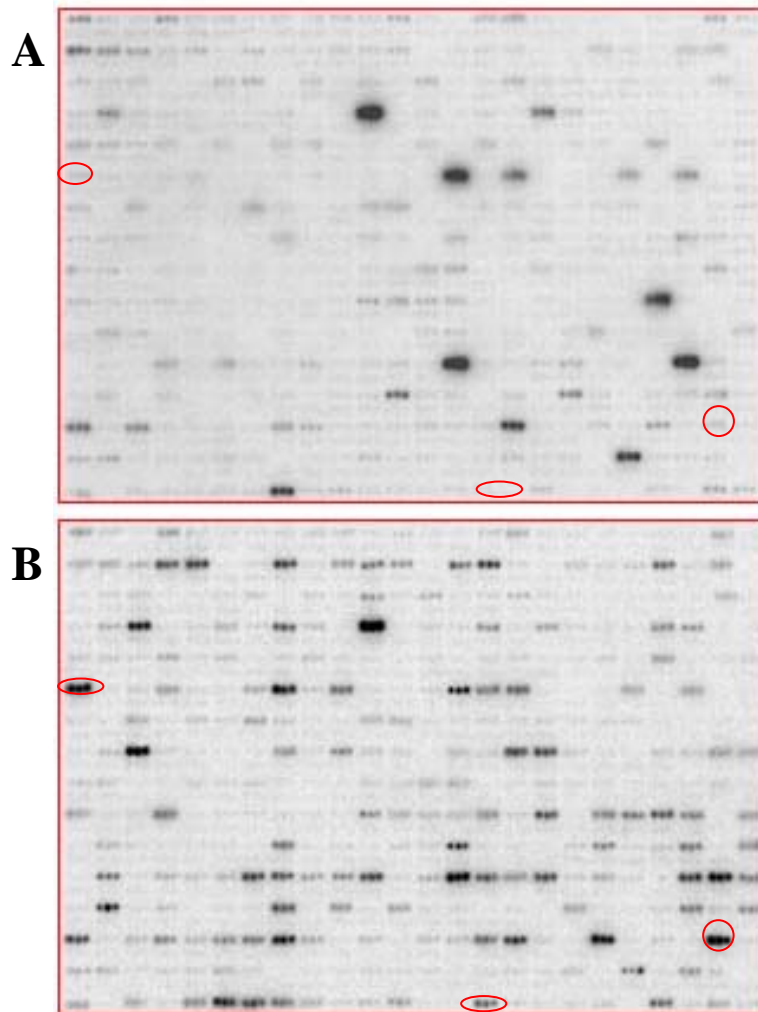

## Supplementary Table S1.

Homology analysis of differentially expressed sequences from the subtracted library.

| Unigene<br>no.         | Length | Homology<br>AGI ID | Annotation                                                        | E-value |
|------------------------|--------|--------------------|-------------------------------------------------------------------|---------|
| <b>Metabolism (20)</b> |        |                    |                                                                   |         |
| BnMSR43                | 469    | AT1G20130          | Anther-specific proline-rich protein APG precursor                | 5e-38   |
| BnMSR54                | 262    | AT1G33430          | Galactosyltransferase family protein                              | 8e-35   |
| BnMSR72                | 457    | AT1G67990          | Caffeoyl-CoA 3-o-methyltransferase                                | 1e-128  |
| BnMSR20                | 231    | AT1G71160          | Fatty acid elongase 3-ketoacyl-CoA synthase 7                     | 3e-77   |
| BnMSR33                | 372    | AT1G74310          | Encodes ClpB1                                                     | 5e-32   |
| BnMSR58                | 343    | AT1G75910          | Family ii extracellular lipase 4                                  | 3e-44   |
| BnMSR45                | 130    | AT1G75940          | Beta-glucosidase protein                                          | 6e-40   |
| BnMSR69                | 438    | AT1G76470          | Cinnamoyl-coa reductase family                                    | 1e-28   |
| BnMSR28                | 372    | AT1G78570          | Encodes a UDP-L-Rhamnose synthase                                 | 2e-48   |
| BnMSR16                | 330    | AT1G79530          | Glyceraldehyde-3-phosphate dehydrogenase                          | 1e-28   |
| BnMSR57                | 299    | AT2G23800          | Geranylgeranyl pyrophosphate synthase 2                           | 1e-131  |
| BnMSR66                | 232    | AT3G23770          | Glycosyl hydrolase family 17 protein                              | 2e-31   |
| BnMSR73                | 226    | AT3G52160          | Beta-ketoacyl-CoA synthase family protein                         | 7e-44   |
| BnMSR74                | 395    | AT3G55440          | Encodes triosephosphate isomerase                                 | 2e-82   |
| BnMSR23                | 329    | AT3G26125          | Cytochrome P450 monooxygenase 86c2                                | 1e-40   |
| BnMSR36                | 379    | AT4G03210          | Encodes a member of xyloglucan<br>endotransglucosylase/hydrolases | 2e-97   |

|                                          |     |           |                                                 |        |
|------------------------------------------|-----|-----------|-------------------------------------------------|--------|
| BnMSR52                                  | 636 | AT4G31500 | Cytochrome P450 monooxygenase 83b1              | 0      |
| BnMSR21                                  | 297 | AT5G04590 | Encoding sulfite reductase                      | 1e-83  |
| BnMSR60                                  | 394 | AT5G07600 | Oleosin / glycine-rich protein                  | 5e-06  |
| BnMSR71                                  | 487 | AT5G38410 | Ribulose biphosphate carboxylase small chain 3B | 1e-167 |
| <b>Transcription (3)</b>                 |     |           |                                                 |        |
| BnMSR32                                  | 506 | AT2G27040 | Argonaute4                                      | 1e-115 |
| BnMSR37                                  | 378 | AT5G62320 | MYB99                                           | 1e-40  |
| BnMSR13                                  | 260 | AT1G61110 | NAC domain containing protein 25                | 6e-88  |
| <b>Protein synthesis (6)</b>             |     |           |                                                 |        |
| BnMSR62                                  | 431 | AT1G33140 | Encodes ribosomal protein L9                    | 6e-14  |
| BnMSR30                                  | 429 | AT1G56070 | Translation elongation factor 2-like protein    | 7e-30  |
| BnMSR26                                  | 396 | AT1G70600 | 60S ribosomal protein L27A                      | 2e-56  |
| BnMSR51                                  | 371 | AT1G74050 | 60S ribosomal protein L6                        | 9e-29  |
| BnMSR56                                  | 271 | AT3G25520 | Encodes ribosomal protein L5                    | 4e-33  |
| BnMSR41                                  | 137 | AT5G16130 | 40S ribosomal protein S7                        | 4e-16  |
| <b>Protein fate (4)</b>                  |     |           |                                                 |        |
| BnMSR68                                  | 501 | AT2G26990 | COP12                                           | 1e-143 |
| BnMSR12                                  | 438 | AT3G10410 | Serine carboxypeptidase-like 49 precursor       | 3e-63  |
| BnMSR09                                  | 282 | AT1G06260 | Cysteine proteinase                             | 8e-41  |
| BnMSR35                                  | 476 | AT3G17830 | DNAJ heat shock family protein                  | 2e-61  |
| <b>Protein with binding function (5)</b> |     |           |                                                 |        |
| BnMSR47                                  | 205 | AT1G56340 | Encodes calreticulin CRT1                       | 2e-77  |

|                                               |     |           |                                                       |        |
|-----------------------------------------------|-----|-----------|-------------------------------------------------------|--------|
| BnMSR18                                       | 566 | AT5G17400 | Encode an ER-localised adenine nucleotide transporter | 1e-142 |
| BnMSR40                                       | 225 | AT5G20720 | Encodes a chloroplast co-chaperonin                   | 2e-38  |
| BnMSR15                                       | 721 | AT1G14180 | Protein binding / zinc ion binding                    | 2e-96  |
| BnMSR67                                       | 236 | AT5G59970 | Histone H4                                            | 3e-37  |
| <b>Lipid/fatty acid transport (9)</b>         |     |           |                                                       |        |
| BnMSR02                                       | 323 | AT3G13220 | ABC transporter family protein                        | 2e-67  |
| BnMSR55                                       | 458 | AT3G63095 | Lipid transfer protein family protein                 | 9e-45  |
| BnMSR46                                       | 532 | AT3G08770 | Lipid transfer protein 6                              | 1e-19  |
| BnMSR24                                       | 463 | AT4G33355 | Lipid transfer protein 3                              | 7e-67  |
| BnMSR04                                       | 415 | AT3G51590 | Lipid transfer protein 12                             | 2e-85  |
| BnMSR07                                       | 484 | AT5G07230 | Lipid transfer protein family protein                 | 8e-46  |
| BnMSR10                                       | 223 | AT1G73890 | Lipid transfer protein family protein                 | 2e-23  |
| BnMSR38                                       | 374 | AT4G28395 | Lipid transfer protein                                | 2e-17  |
| BnMSR61                                       | 309 | AT2G38540 | Lipid transfer protein                                | 5e-24  |
| <b>Cell rescue, defence and virulence (3)</b> |     |           |                                                       |        |
| BnMSR44                                       | 455 | AT2G18150 | Peroxidase                                            | 1e-149 |
| BnMSR50                                       | 296 | AT5G15960 | Cold and ABA inducible protein kin1                   | 3e-07  |
| BnMSR53                                       | 304 | AT5G13380 | Auxin-responsive GH3 family protein                   | 1e-52  |
| <b>Unclassified proteins (18)</b>             |     |           |                                                       |        |
| BnMSR75                                       | 365 | AT1G30020 | Expressed protein                                     | 2e-54  |
| BnMSR65                                       | 235 | AT5G48210 | Expressed protein                                     | 2e-13  |

|                                                          |      |            |                                                              |        |
|----------------------------------------------------------|------|------------|--------------------------------------------------------------|--------|
| BnMSR63                                                  | 365  | AT1G68875  | Expressed protein                                            | 1e-15  |
| BnMSR59                                                  | 333  | AT1G54540  | Expressed protein                                            | 5e-58  |
| BnMSR48                                                  | 368  | AT4G37900  | Glycine-rich protein                                         | 2e-46  |
| BnMSR70                                                  | 166  | AT2G18115  | Glycine-rich protein                                         | 5e-13  |
| BnMSR39                                                  | 223  | AT2G03740  | Late embryogenesis abundant domain-containing protein        | 5e-11  |
| BnMSR34                                                  | 460  | AT5G09530  | Hydroxyproline-rich glycoprotein family protein              | 2e-33  |
| BnMSR17                                                  | 432  | AT1G06060  | RanBPM-related protein                                       | 1e-68  |
| BnMSR25                                                  | 403  | AT4G22090  | Pectate lyase family protein                                 | 1e-168 |
| BnMSR06                                                  | 289  | AT5G44540  | Tapetum-specific protein-related protein                     | 7e-17  |
| BnMSR11                                                  | 352  | AT4G20420  | Tapetum-specific protein-related protein                     | 3e-14  |
| BnMSR76                                                  | 394  | AT2G19070  | Spermidine hydroxycinnamoyl transferase                      | 6e-92  |
| BnMSR19                                                  | 187  | AT1G04590  | Similar to pentatricopeptide (PPR) repeat-containing protein | 1e-35  |
| BnMSR42                                                  | 410  | AT5G65205  | Short-chain dehydrogenase/reductase (SDR) family protein     | 1e-09  |
| BnMSR14                                                  | 477  | AT5G61120  | Zinc ion binding                                             | 3e-54  |
| BnMSR29                                                  | 443  | AT3G15400  | ATA20                                                        | 3e-23  |
| BnMSR64                                                  | 1131 | AT3G03440  | Armadillo/beta-catenin repeat family protein                 | 0      |
| <b>No significant homology in <i>Arabidopsis</i> (8)</b> |      |            |                                                              |        |
| BnMSR01                                                  | 452  | EX047123.1 | Floral buds cDNA of <i>Brassica rapa</i>                     | 0      |
| BnMSR03                                                  | 450  | EV149585.1 | Early anther cDNA of <i>Brassica napus</i>                   | 0      |

|         |     |            |                                            |   |
|---------|-----|------------|--------------------------------------------|---|
| BnMSR05 | 168 | EX050192.1 | Floral buds cDNA of <i>Brassica rapa</i>   | 0 |
| BnMSR08 | 373 | EX051636.1 | Floral buds cDNA of <i>Brassica rapa</i>   | 0 |
| BnMSR27 | 205 | EV148747.1 | Early anther cDNA of <i>Brassica napus</i> | 0 |
| BnMSR31 | 244 | EX016113.1 | Early anther cDNA of <i>Brassica rapa</i>  | 0 |
| BnMSR49 | 351 | CD845467.1 | Early anther cDNA of <i>Brassica napus</i> | 0 |
| BnMSR22 | 396 | CD841875.1 | Early anther cDNA of <i>Brassica napus</i> | 0 |

## Supplementary Table S2.

Gene-specific primer pairs used in this study

| Gene name  | Primers (5'-3')             | Used for      |
|------------|-----------------------------|---------------|
| BnCYP703A2 | ACGAATGGGCTATGGCTGAAG       | Real-time PCR |
|            | TCATTGACCATCCGGTTTGATC      |               |
| BnACOS5    | GTGGCTTGTGTTGTGATGAATCC     | Real-time PCR |
|            | CACAAAATGGACGGCTCTGATC      |               |
| BnCYP704B1 | TCAGAGCTACAAGAACTCGAAAGAGAA | Real-time PCR |
|            | TTACCCTCTCGTTGAAGGACTTGA    |               |
| BnMS2      | AGCTTGAGTTTGGGTTTGATGTTG    | Real-time PCR |
|            | AAGCCCTCCTTTCAAAACATGTC     |               |
| BnNEF1     | GAGGCCGTGAATGGTTCCTTG       | Real-time PCR |
|            | GTGCTGTAACCTCCACACGTACCTGTT |               |
| BnFLP      | AAGACTTGGATCGTTGGGAAATG     | Real-time PCR |
|            | ATTTGAGGATTGGTGGCACTACAA    |               |
| BnMSR20    | GGCAGATTGGGTTTGGAAAGTG      | Real-time PCR |
|            | GTGTATTCGATCAGACCATGCATTC   |               |
| BnMSR73    | TTACAACGCTTCGTCTTGAG        | Real-time PCR |
|            | CTTCCGTCAGTTTGAGATCCTTCTG   |               |
| BnMSR23    | TTGAGCCTCGAGTTACAACCACTT    | Real-time PCR |
|            | CCCGTTTATAGCTTGTTTCGATCTTCT |               |
| BnACTIN7   | CGCGCCTAGCAGCATGAA          | Real-time PCR |
|            | GTTGGAAAGTGCTGAGAGATGCA     |               |
| BnQRT1     | GGGAATGATCGACCATGCAA        | Real-time PCR |
|            | AACCATTGTGAAGGGTGGGTACTTT   |               |
| BnQRT2     | CCGGCAATGCTTGTTTCTGAA       | Real-time PCR |
|            | AGAAACCGGATATGGCAGAGTTG     |               |
| BnQRT3     | AAGCGTGCCATACTACCATCCA      | Real-time PCR |
|            | GAGCTTCGGTCATGGTCCCTTTAT    |               |



|            |                                                        |                    |
|------------|--------------------------------------------------------|--------------------|
| BnCHS1     | GTGAAGACACGCTACACCGTCAT<br>TTGCGATCTCAAGCCTCTGTTTG     | Real-time PCR      |
| BnCHS2     | CAGGTGGACCAGCCATCTTG<br>GCGTTGCCGTAGTCCATGAG           | Real-time PCR      |
| BnCP1      | ACAAAGGCTGTAGTGGTGGATTAATG<br>CGGTACCATCTGTGGCTGTGTATG | Real-time PCR      |
| BnCP2      | CGGAGCTCTTGAAGGTGCTAACT<br>AACCTGCTTCTTCCGGATCACA      | Real-time PCR      |
| BnCP3      | ATGAAGACCAAATCGCTGCAAATC<br>GGCACGAGACTCCTCCTATGT      | Real-time PCR      |
| BnCP4      | CTGTCCGCCGCATCACTAAG<br>CGGCTCCTTTCTGTCTCCAATC         | Real-time PCR      |
| BnCP5      | ATCAAGCCACCGACCAAGTGT<br>ATCCCAACCGAAGCAGTACTTAC       | Real-time PCR      |
| BnMSR55    | TTGCTAGCGAAACCAGCTCATG<br>GGAGGATTGATCAGCGAATGAGT      | Real-time PCR      |
| BnMSR02    | TGGTTTGATGTTCTATATCTGCATC<br>TGAAGTAGACAATGATCATGAAGAA | Real-time PCR      |
| BnMSR29    | AAGCGTGCCATACTACCATCCA<br>GAGCTTCGGTCATGGTCCCTTTAT     | Real-time PCR      |
| BnA6       | TAACCCTCTGCCTAAACC<br>GCTCGTAACATTCTCTGC               | Real-time PCR      |
| BnMSR66    | GAAGATGACTGCTAACCCGC<br>CCAAGCCGTTGAAGTAGCAC           | Real-time PCR      |
| BnMSR46    | AGTATCAGCCCTTCCACCAACTG<br>CCAAGCCATGTCTAACTTCTCGTA    | Real-time PCR      |
| BnMSR61    | CCGCTAACGCCTTCCCTACTC<br>GCAGTTGGTGGTTTTGCTGATC        | Real-time PCR      |
| Atmsr02_LP | TTTTCCAGAATTGGCTTTGTG                                  | SALK<br>Genotyping |
| Atmsr02_RP | GACTTCCACCAGAGAAGACCC                                  |                    |
| Salk_LB2   | ATTTTgCCgATTTCggAAC                                    |                    |

---

|                        |                       |            |
|------------------------|-----------------------|------------|
| Atmsr53-SALK_121737-LP | GTTAGCCCTTCGATGTGTCTG |            |
| Atmsr53-SALK_121737-RP | ATCTGTGAGATTTGAGGGCAG | SALK       |
| Atmsr42-SALK_144641-LP | CCCAGATGTGAATTGGCTTTC | Genotyping |
| Atmsr42-SALK_144641-RP | TTAAGCCATTTGGGATTGATG |            |

---
